# Supplementary material for: A sulphide lithium super ion conductor is superior to liquid ion conductors for use in rechargeable batteries
Source: Royal Society of Chemistry journal article supplement (doi:10.1039/c3ee41655k), 2013-12-16
Supplement: c3ee41655k.pdf [file c3ee41655k.pdf]

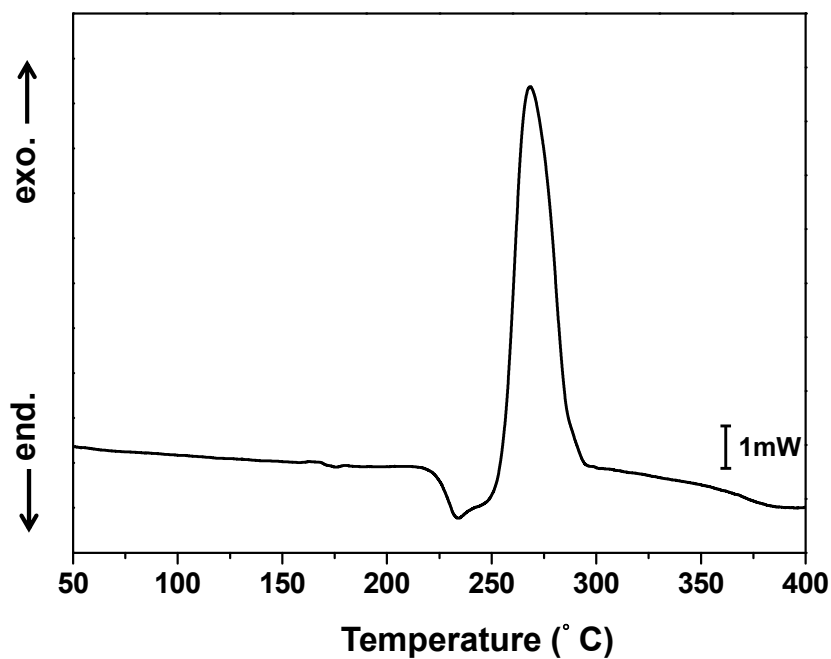

Figure S1. Differential scanning calorimetry (DSC) curve for the  $\text{Li}_2\text{S}-\text{P}_2\text{S}_5$  glass. The DSC was performed for a powdered sample sealed in a titanium pan using a scanning calorimeter (Perkin Elmer, Diamond DSC) at a heating rate of  $10^{\circ}\text{C}/\text{min}$ . The change of the specific heat at about  $230^{\circ}\text{C}$  corresponds to the glass transition, and the exothermic peak from  $255^{\circ}\text{C}$  to  $280^{\circ}\text{C}$  corresponds to the crystallization.

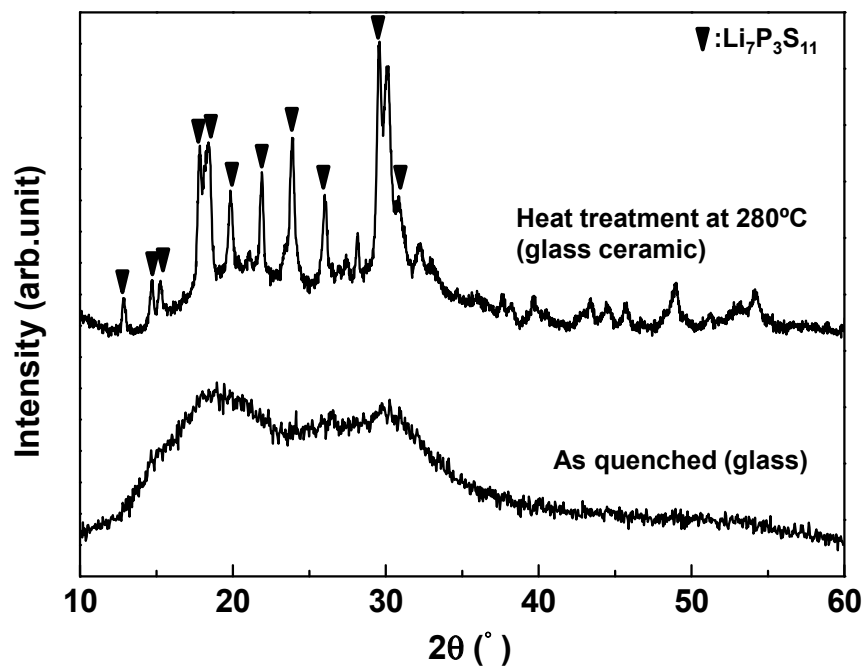

Figure S2. Powder X-ray diffraction patterns for the as-quenched glass and that after the heat treatment at 280 °C. XRD patterns were taken on a diffractometer (Rigaku, RINT-2000) using Cu-K $\alpha$  radiation.

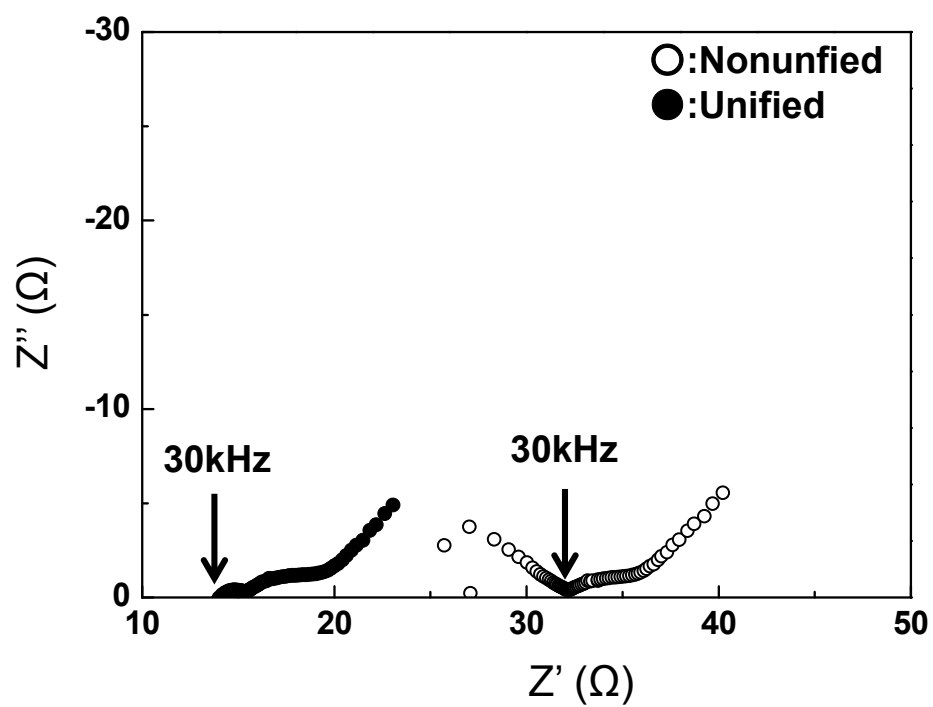

Figure S3. Complex impedance plots at 25 °C for a graphite/In-Li model cell unified at 280 °C model cell and a non-unified counterpart.

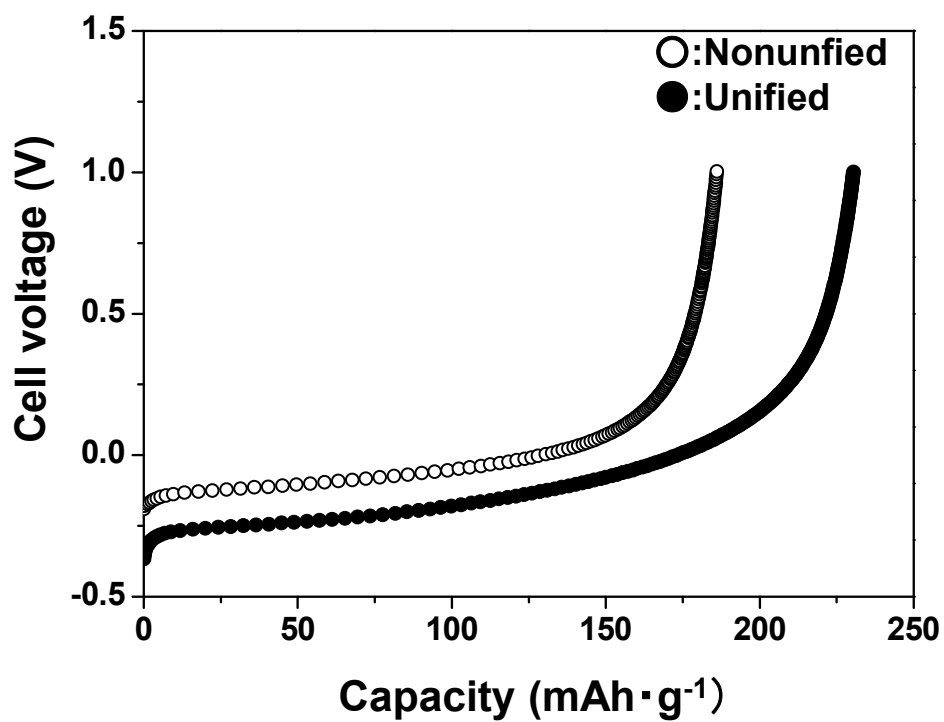

Figure S4. Discharge curves of graphite electrodes in a model cell unified at 280 °C and a non-unified model cell. Counter electrodes are In-Li alloy, and the discharge current density is 10mAcm<sup>-2</sup>.
